# Supplementary material
Source: HighWire-hosted journal article supplement (https://jnm.snmjournals.org/highwire/filestream/108220/field_highwire_adjunct_files/0/261900_Supplemental_Data.pdf)
Supplement: 261900_Supplemental_Data.pdf [file 261900_Supplemental_Data.pdf]

**Supplemental Table 1:** Results of imaging, pre- and post- operative PTH levels and histological results in 144 operated patients

| Patient | Age/sex | CU       | MIBI Scintigraphy | FCH-PET/CT | PTH preoperative (pg/mL) | PTH postoperative (pg/mL) | Histology | Para-thyroid size (mm) PoidSPP SUL max | Para-thyroid weight (g) | Para-thyroid SUL <sub>max</sub> | Thyroid SUL <sub>max</sub> | Detectioncoefficient SUL <sub>max</sub> (%) |
|---------|---------|----------|-------------------|------------|--------------------------|---------------------------|-----------|----------------------------------------|-------------------------|---------------------------------|----------------------------|---------------------------------------------|
| 1       | 33/M    | LTC      | Negative          | LTC        | 182                      | 54                        | LPA       | 20                                     | 0.4                     | 6.99                            | 3.87                       | 81                                          |
| 2       | 30/M    | LTC      | LTC               | LTC        | 120                      | 6                         | LPA       | 20                                     | 0.4                     | 3.86                            | 2.03                       | 90                                          |
| 3       | 74/M    | RTC      | RTC               | RTC        | 168                      | 35                        | RPA       | 15                                     | 1.2                     | 9.3                             | 2.43                       | 283                                         |
| 4       | 61/F    | RTC+LTC  | RTC               | RTC+LTC    | 124                      | 12                        | RPA       | 18                                     | 1.8                     | 8.57+4.81                       | 2.68                       | 220+80                                      |
| 5       | 66/F    | LTC      | LTC               | LTC        | 189                      | 10                        | LPA       | 20                                     | 0.7                     | 7.9                             | 3.1                        | 155                                         |
| 6       | 63/F    | RTC      | RTC               | RTC        | 150                      | 37                        | RH        | 20                                     | 2                       | 13.5                            | 2.64                       | 411                                         |
| 7       | 47/F    | RTC      | RTC               | RTC        | 95                       | 22                        | RPA       | 25                                     | 1.8                     | 6.17                            | 2.7                        | 129                                         |
| 8       | 61/F    | LTC      | LTC               | LTC        | 171                      | 25                        | LPA       | 30                                     | 1.6                     | 5.38                            | 1.53                       | 252                                         |
| 9       | 53/F    | LTC      | LTC               | LTC        | 113                      | 29                        | LPA       | 24                                     | 3                       | 4.5                             | 1.63                       | 176                                         |
| 10      | 78/F    | LTC      | LTC               | LTC        | 59                       | 38                        | LPA       | 17                                     | 0.6                     | 8.76                            | 2.64                       | 232                                         |
| 11      | 60/F    | LTC      | LTC               | LTC        | 66                       | 24                        | LPA       | 20                                     | 1.1                     | 6.76                            | 4.93                       | 37                                          |
| 12      | 54/F    | LTC      | LTC               | LTC        | 64                       | 38                        | LPA       | 13                                     | MD                      | 8.43                            | 2.2                        | 283                                         |
| 13      | 69/M    | LTC      | Negative          | LTC        | 72                       | 23                        | LPA       | 29                                     | 0.7                     | 10.47                           | 1.94                       | 440                                         |
| 14      | 75/F    | LTC      | Negative          | LTC        | 70                       | 10                        | LPA       | MD                                     | MD                      | 7                               | 3.11                       | 125                                         |
| 15      | 69/F    | LTC      | LTC               | LTC        | 100                      | 15                        | LH        | 30                                     | 2                       | 7                               | 1.8                        | 289                                         |
| 16      | 63/F    | RTC      | Negative          | RTC        | 140                      | 18                        | RPA       | 8                                      | MD                      | 2.17                            | 2.11                       | 51                                          |
| 17      | 62/F    | RTC      | RTC               | RTC        | 105                      | 29                        | RPA       | 7                                      | MD                      | 4.2                             | MD                         | MD                                          |
| 18      | 53/F    | Negative | Negative          | RTC        | 90                       | 18                        | RPA       | 20                                     | 0.6                     | 15.96                           | 0.94                       | 1598                                        |
| 19      | 53/F    | LTC      | LTC               | LTC        | 51                       | 11                        | LPA       | 15                                     | MD                      | 9.64                            | 1.87                       | 416                                         |
| 20      | 51/F    | LTC      | Negative          | LTC        | 63                       | 12                        | LPA       | 20                                     | 0.9                     | 4.61                            | 2.73                       | 69                                          |
| 21      | 50/F    | LTC      | Negative          | LTC        | 119                      | 38                        | LPA       | MD                                     | MD                      | 8                               | 1.77                       | 352                                         |
| 22      | 60/F    | LTC      | Negative          | LTC        | 118                      | 48                        | LPA       | 10                                     | 0.5                     | 6.85                            | 1.09                       | 528                                         |
| 23      | 74/F    | RTC      | RTC               | RTC        | 208                      | 44                        | RPA       | 20                                     | MD                      | 4.43                            | MD                         | MD                                          |
| 24      | 80/M    | LTC      | LTC               | LTC        | 117                      | 24                        | LPA       | 30                                     | 1.2                     | 14.42                           | 2.99                       | 382                                         |
| 25      | 66/F    | RTC+LTC  | Negative          | LTC        | 112                      | 35                        | LPA       | 22                                     | 3                       | 4.6                             | 1.78                       | 158                                         |
| 26      | 65/F    | LTC      | LTC               | LTC        | 91                       | 48                        | LH        | 15                                     | MD                      | 8.94                            | 2.85                       | 214                                         |
| 27      | 63/F    | Negative | RTC+LTC           | RTC+LTC    | 259                      | 11                        | RH+LH     | 30+25                                  | 4.5+1.3                 | 10.6+6.8                        | 1.75                       | 506+289                                     |

|    |      |          |          |         |     |    |       |     |         |       |      |        |
|----|------|----------|----------|---------|-----|----|-------|-----|---------|-------|------|--------|
| 28 | 80/F | Negative | Negative | LTC     | 165 | 9  | LPA   | 24  | 2       | 6.14  | 5.31 | 15.6   |
| 29 | 59/M | RTC      | RTC      | RTC     | 91  | 6  | RPA   | 20  | MD      | 4.71  | 2.07 | 128    |
| 30 | 66/M | Negative | RTC      | RTC     | 263 | 7  | RPA   | 24  | 1.4     | 5.37  | 1.45 | 270    |
| 31 | 41/F | LTC      | Negative | LTC     | 108 | 37 | LPA   | 15  | 0.2     | 4     | 4.82 | -17    |
| 32 | 33/F | LTC      | Negative | LTC     | 95  | 55 | LPA   | 10  | 0.2     | 5.04  | 2.54 | 98     |
| 33 | 63/F | LTC      | Negative | LTC     | 104 | 17 | LPA   | 7   | 2       | 4     | 1.57 | 155    |
| 34 | 70/F | RTC+LTC  | Negative | RTC     | 110 | 45 | RPA   | 15  | 0.5     | 5.18  | 2.11 | 145    |
| 35 | 69/F | LTC      | RTC+LTC  | RTC     | 74  | 28 | RPA   | 15  | 0.4     | 6.06  | 2.63 | 130    |
| 36 | 62/M | Negative | Negative | EL      | 132 | 16 | EPA   | 11  | MD      | 3.52  | 2.32 | 52     |
| 37 | 68/F | LTC      | LTC      | LTC     | 638 | 35 | LPA   | 25  | 2.7     | 22.9  | 2.95 | 676    |
| 38 | 70/F | RTC      | Negative | RTC     | 80  | 28 | RPA   | 12  | 1       | 5.69  | MD   | MD     |
| 39 | 90/F | LTC      | LTC      | LTC     | 69  | 23 | LPA   | 15  | 0.5     | 12.35 | 2.89 | 327    |
| 40 | 39/F | LTC      | LTC      | LTC     | 111 | 38 | LPA   | 15  | 0.4     | 8.3   | 2.85 | 191    |
| 41 | 64/F | RTC      | Negative | RTC     | 153 | 18 | RPA   | 23  | 1.6     | 4.9   | 2.17 | 126    |
| 42 | 66/F | RTC      | RTC      | RTC     | 88  | 32 | RPA   | 14  | 0.6     | 7.58  | 2.19 | 246    |
| 43 | 54/F | RTC      | RTC      | RTC     | 113 | 65 | RPA   | 15  | 1.4     | 7.85  | 3.62 | 117    |
| 44 | 48/F | RTC+LTC  | Negative | RTC+LTC | 77  | 44 | RH+LH | 7+8 | 0.2+0.1 | 3+4.4 | 2.1  | 43+110 |
| 45 | 23/F | LTC      | LTC      | LTC     | 173 | 40 | LPA   | MD  | 0.3     | 11.1  | 1.97 | 463    |
| 46 | 71/F | RTC      | RTC      | RTC     | 119 | 62 | RPA   | 18  | 0.4     | MD    | MD   | MD     |
| 47 | 72/F | LTC      | LTC      | LTC     | 72  | 16 | LPA   | 17  | 1       | 4.82  | 1.77 | 172    |
| 48 | 47/F | LTC      | LTC      | LTC     | 125 | 53 | LPA   | 20  | 0.8     | 6.73  | 2.04 | 230    |
| 49 | 65/F | RTC      | RTC      | RTC     | 130 | 44 | RPA   | 20  | 0.7     | 3.61  | 2.15 | 68     |
| 50 | 64/F | RTC      | RTC      | RTC     | 80  | 19 | RPA   | 11  | 0.4     | 5.84  | 1.59 | 267    |
| 51 | 73/F | Negative | RTC      | EL      | 95  | 42 | EPA   | 15  | 0.2     | 7     | 1.78 | 293    |
| 52 | 64/M | RTC+LTC  | LTC      | LTC     | 180 | 64 | LPA   | 20  | 1.1     | 7     | 1.79 | 291    |
| 53 | 52/F | Negative | Negative | LTC     | 335 | 15 | LPA   | 13  | 0.3     | 3.06  | 1.54 | 99     |
| 54 | 37/F | LTC      | Negative | LTC     | 150 | 36 | LPA   | 30  | 1.1     | 4.65  | 3.34 | 39     |
| 55 | 48/F | Negative | LTC      | RTC     | 121 | 32 | RPA   | 20  | MD      | MD    | MD   | MD     |
| 56 | 64/F | RTC      | RTC      | RTC     | 86  | 55 | RPA   | 18  | 0.9     | 8.1   | 2.58 | 214    |
| 57 | 78/F | Negative | RTC      | RTC     | 135 | 24 | RPA   | 23  | 4       | 5.8   | 2.57 | 126    |
| 58 | 87/F | RTC      | RTC      | RTC     | 281 | 11 | RPA   | 9   | 0.2     | 5.55  | 3.04 | 83     |
| 59 | 70/F | Negative | LTC      | LTC     | 208 | 8  | LPA   | 15  | 0.3     | 5.97  | 2.75 | 237    |

|    |      |          |          |          |     |    |          |       |     |           |      |         |
|----|------|----------|----------|----------|-----|----|----------|-------|-----|-----------|------|---------|
| 60 | 43/F | Negative | LTC      | RTC      | 147 | 7  | LPA      | 14    | 0.1 | 3.99      | 2.06 | 94      |
| 61 | 31/M | LTC      | LTC      | LTC      | 120 | 28 | LPA      | 20    | 0.4 | 3.86      | MD   | MD      |
| 62 | 56/F | LTC      | Negative | LTC      | 124 | 44 | LPA      | 10    | 0.2 | 4.02      | 1.06 | 279     |
| 63 | 62/F | Negative | Negative | LTC      | 110 | 36 | LPA      | 8     | 0.2 | 6.09      | MD   | MD      |
| 64 | 49/F | RTC+LTC  | RTC      | RTC+LTC  | 56  | 16 | RPA      | 14    | 0.4 | 5.08+4.09 | 1.74 | 192+135 |
| 65 | 56/F | RTC      | RTC      | RTC      | 100 | 62 | RPA      | 18    | 0.9 | 14.5      | 2.83 | 412     |
| 66 | 64/F | LTC      | LTC      | LTC      | 85  | 62 | LPA      | 19    | 0.4 | 3.82      | 1.33 | 187     |
| 67 | 61/F | RTC      | RTC      | RTC+LTC  | 110 | 7  | RH+LH    | 24+11 | MD  | 4.94+6.25 | 1.66 | 198+277 |
| 68 | 72/F | LTC      | LTC      | LTC      | 67  | 30 | LPA      | 9     | 0.3 | 4.3       | 1.23 | 250     |
| 69 | 69/F | Negative | LPA      | LPA      | 80  | 34 | LPA      | 16    | 0.7 | 5.92      | 1.28 | 363     |
| 70 | 67/F | RTC      | Negative | RTC      | 135 | 17 | RPA      | 11    | 0.1 | 3.87      | 2.27 | 70      |
| 71 | 55/F | RTC      | Negative | RTC      | 104 | 57 | RPA      | 10    | 1.9 | 5.83      | 1.53 | 281     |
| 72 | 65/F | RTC      | LTC      | LTC      | 240 | 55 | LPA      | 7     | MD  | 2.26      | 1.44 | 57      |
| 73 | 62/F | Negative | Negative | LTC      | 100 | 32 | LPA      | 10    | 4   | 5.1       | 1.35 | 278     |
| 74 | 59/F | LTC      | Negative | LTC      | 106 | 49 | LPA      | 12    | 4   | MD        | MD   | MD      |
| 75 | 61/F | Negative | RTC      | RTC      | 100 | 19 | RPA      | 13    | 0.7 | MD        | MD   | MD      |
| 76 | 55/M | Negative | LTC      | LTC      | 89  | 54 | LPA      | 15    | 0.1 | MD        | MD   | MD      |
| 77 | 38/F | RTC      | Negative | RTC      | 251 | 64 | RPA      | 14    | 3   | 6.12      | 2.13 | 187     |
| 78 | 71/F | Negative | Negative | EL       | 143 | 65 | EPA      | 23    | 1   | 4.5       | 1.73 | 160     |
| 79 | 71/F | RTC      | Negative | RTC      | 144 | 41 | RPA      | 12    | 0.2 | 3.8       | 1.7  | 124     |
| 80 | 71/F | Negative | Negative | RTC      | 171 | 60 | RPA      | 32    | 0.3 | 3.77      | 1.79 | 111     |
| 81 | 79/F | Negative | Negative | EL       | 171 | 31 | EPA      | 25    | 0.9 | 3.85      | 2.91 | 32      |
| 82 | 72/F | Negative | Negative | RTC      | 98  | 66 | Negative | 8     | MD  | 4.15      | 1.62 | 156     |
| 83 | 51/M | Negative | EL       | EL       | 92  | 56 | EPA      | 18    | 0.5 | MD        | MD   | MD      |
| 84 | 81/F | LTC      | LTC      | LTC      | 135 | 31 | LPA      | 15    | MD  | MD        | MD   | MD      |
| 85 | 49/F | RTC      | RTC      | RTC      | 76  | 32 | RPA      | 20    | 0.7 | MD        | MD   | MD      |
| 86 | 60/F | RTC      | RTC      | RTC      | 75  | 31 | RPA      | 15    | 0.4 | 5.22      | 1.68 | 211     |
| 87 | 50/F | RTC      | Negative | Negative | 75  | 35 | RPA      | 10    | 0.1 | MD        | MD   | MD      |
| 88 | 32/F | RTC      | Negative | RTC      | 136 | 65 | RPA      | 25    | 1.6 | 4.85      | 1.24 | 291     |
| 89 | 55/F | RTC      | Negative | RTC      | 135 | 31 | RPA      | 17    | 1.2 | 10.44     | 1.76 | 493     |
| 90 | 54/F | LTC      | LTC      | LTC      | 120 | 58 | LPA      | 20    | 0.5 | 9.29      | 1.7  | 446     |

|     |      |          |          |     |     |     |     |    |     |       |      |     |
|-----|------|----------|----------|-----|-----|-----|-----|----|-----|-------|------|-----|
| 91  | 59/F | LTC      | Negative | LTC | 150 | 64  | LPA | 17 | MD  | 4.62  | 1.81 | 155 |
| 92  | 41/F | RTC      | Negative | RTC | 82  | 20  | RPA | MD | MD  | 4.32  | 2.88 | 50  |
| 93  | 77/M | Negative | RTC      | RTC | 525 | 59  | RPA | 22 | 2.1 | 5.19  | 1.69 | 207 |
| 94  | 85/M | RTC      | RTC      | RTC | 121 | 65  | RPA | 25 | 1.2 | 9.69  | 2.03 | 377 |
| 95  | 68/F | RTC      | RTC      | RTC | 132 | 62  | RPA | 20 | 1.3 | 10.38 | 2.72 | 281 |
| 96  | 77/M | RTC      | Negative | RTC | 93  | 43  | RPA | 17 | 0.5 | 7.21  | 1.17 | 516 |
| 97  | 71/F | LTC      | LTC      | LTC | 90  | 44  | LPA | MD | MD  | 3.75  | 1.74 | 115 |
| 98  | 74/F | RTC      | Negative | RTC | 200 | 52  | RPA | 15 | 1.1 | 4.32  | 1.87 | 131 |
| 99  | 85/M | RTC      | RTC      | RTC | 70  | 42  | RPA | 15 | 0.7 | 1.56  | 1.22 | 279 |
| 100 | 74/M | LTC      | LTC      | LTC | 351 | 18  | LPA | 17 | 1   | MD    | MD   | MD  |
| 101 | 54/F | RTC      | RTC      | RTC | 230 | 11  | RPA | 26 | 4   | 6.94  | 1    | 594 |
| 102 | 40/F | RTC      | RTC      | RTC | 74  | 82  | RPA | 20 | MD  | 2.78  | 2.58 | 78  |
| 103 | 63/F | RTC      | RTC      | RTC | 85  | 73  | RPA | 19 | 1,3 | 6.72  | 1.59 | 323 |
| 104 | 39/F | RTC      | RTC      | RTC | 133 | 75  | RPA | 13 | 0,7 | 6.69  | 2.39 | 180 |
| 105 | 69/F | RTC      | RTC      | RTC | 224 | 22  | RPA | MD | MD  | 3.68  | 1.63 | 126 |
| 106 | 65/F | LTC      | LTC      | LTC | 102 | 45  | LPA | 17 | 1,1 | 10    | 2.03 | 393 |
| 107 | 67/F | RTC      | Negative | RTC | 227 | 76  | RPA | 18 | 1   | 3.1   | 1.42 | 118 |
| 108 | 45/F | Negative | RTC      | RTC | 98  | 11  | RPA | 14 | 0,4 | 9.48  | 1.52 | 524 |
| 109 | 54/F | LTC      | LTC      | LTC | 160 | 54  | LPA | MD | MD  | 3.1   | 2.92 | 62  |
| 110 | 48/F | RTC      | RTC      | RTC | 79  | 44  | RPA | 12 | 0,8 | 8.91  | 1.08 | 725 |
| 111 | 57/F | RTC      | RTC      | RTC | 109 | 77  | RPA | 21 | 0,9 | 13.14 | 2.92 | 350 |
| 112 | 47/M | RTC      | Negative | RTC | 75  | 11  | RPA | 21 | 0,9 | MD    | MD   | MD  |
| 113 | 82/F | LTC      | LTC      | LTC | 178 | 82  | LPA | MD | MD  | 2.85  | 0.89 | 220 |
| 114 | 70/F | Negative | LTC      | LTC | 209 | 126 | LPA | 25 | 1,1 | 6.66  | 1.29 | 416 |
| 115 | 70/F | LTC      | LTC      | LTC | 93  | 58  | LPA | 12 | 0,4 | 3.99  | 1.58 | 152 |
| 116 | 81/F | Negative | RTC      | RTC | 185 | 52  | RPA | 12 | 0.3 | 2.43  | 1.3  | 87  |
| 117 | 60/F | RTC      | Negative | RTC | 82  | 74  | RPA | 8  | 0.4 | MD    | MD   | MD  |
| 118 | 60/M | RTC      | RTC      | RTC | 115 | 39  | RPA | 17 | 0.7 | 3.12  | 1.17 | 167 |
| 119 | 65/F | RTC      | RTC      | RTC | 125 | 53  | RPA | 15 | MD  | 2.81  | 1.86 | 51  |
| 120 | 69/F | LTC      | LTC      | LTC | 105 | 26  | LPA | 19 | MD  | 10.3  | 2.51 | 310 |
| 121 | 69/F | Negative | LTC      | LTC | 113 | 105 | LPA | 11 | MD  | 2.93  | 2.88 | 17  |
| 122 | 77/F | Negative | LTC      | LTC | 395 | 46  | LPA | 27 | MD  | 7.17  | 0.44 | 153 |

|     |      |          |          |         |     |    |         |       |         |           |      |         |
|-----|------|----------|----------|---------|-----|----|---------|-------|---------|-----------|------|---------|
| 123 | 77/F | LTC      | LTC      | LTC     | 90  | 52 | LPA     | 17    | 0.8     | 13.6      | 2.75 | 395     |
| 124 | 74/F | RTC      | Negative | RTC+LTC | 144 | 30 | LPA     | 15    | 2       | 6.35      | 2    | 217     |
| 125 | 46/F | RTC      | RTC      | RTC     | 849 | 94 | RPA     | 29    | 6.8     | 8.86      | 1.94 | 357     |
| 126 | 82/M | Negative | Negative | LTC     | 146 | 85 | LPA     | 27    | 1.9     | 6.74      | 2.14 | 215     |
| 127 | 69/F | LTC      | Negative | RTC+LTC | 139 | 62 | RPA+LPA | 18+14 | MD      | 7.24+7.11 | 1.35 | 436+427 |
| 128 | 77/F | RTC      | RTC      | RTC     | 39  | 27 | RPA     | 15    | 2       | 3.24      | 1.99 | 63      |
| 129 | 53/M | RTC      | RTC      | RTC     | 158 | 40 | RPA     | 35    | MD      | 4.82      | 2.04 | 136     |
| 130 | 70/M | RTC      | RTC      | RTC     | 273 | 65 | RPA     | 25    | 1.8     | 8.64      | 2.5  | 25      |
| 131 | 51/M | RTC+LTC  | RTC      | RTC+LTC | 75  | 23 | RPA+LPA | 25+15 | 0.7+0.3 | 4.77      | 1.84 | 159     |
| 132 | 59/F | LTC      | LTC      | LTC     | 102 | 13 | LPA     | 12    | 0.4     | 5.29      | 2.31 | 129     |
| 133 | 56/F | Negative | LTC      | LTC     | 140 | 43 | LPA     | 16    | MD      | 5.52      | 2.13 | 159     |
| 134 | 63/M | Negative | RTC      | RTC     | 120 | 33 | RPA     | 11    | 0.2     | 4.09      | 1.97 | 108     |
| 135 | 75/F | LTC      | LTC      | LTC     | 149 | 75 | LPA     | 17    | MD      | 3.64      | 2.99 | 22      |
| 136 | 51/F | RTC      | RTC      | RTC     | 120 | 50 | RPA     | 12    | 0.3     | 4.3       | 3.97 | 83      |
| 137 | 37/M | Negative | Negative | LPA     | 164 | 94 | LPA     | 12    | 0.7     | 10.82     | 2.43 | 345     |
| 138 | 59/F | Negative | RTC      | RTC     | 109 | 6  | RPA     | 20    | 0.8     | 4.3       | 1.79 | 140     |
| 139 | 72/F | RTC      | RTC      | RTC     | 137 | 20 | RPA     | 15    | 0.5     | MD        | MD   | MD      |
| 140 | 66/F | LTC      | LTC      | LTC     | 250 | 77 | LPA     | 12    | MD      | 8.8       | 2.02 | 336     |
| 141 | 63/M | LTC      | LTC      | LTC     | 293 | 99 | LPA     | 35    | 7.5     | 4.74      | 1.87 | 153     |
| 142 | 74/F | LTC      | LTC      | LTC     | 165 | 95 | LPA     | MD    | 0.6     | 9.79      | 3.25 | 201     |
| 143 | 65/F | LTC      | LTC      | LTC     | 102 | 95 | LPA     | 14    | MD      | 6.39      | 3.73 | 71      |
| 144 | 73/F | RTC+LTC  | Negative | RTC+LTC | 200 | 90 | RPA+LPA | 12+9  | 0.5+0.8 | 4.79+3.93 | 2.16 | 122+81  |

PTH: parathormone; M: male; F: female; LTC: hyper-functional left parathyroid thyroid compartment; RTC: hyper-functional right parathyroid thyroid compartment; LH: left parathyroid hyperplasia; RH: right parathyroid hyperplasia; EL: ectopic location; LPA: left parathyroid adenoma; RPA: right parathyroid adenoma; EPA: ectopic parathyroid adenoma; MD: missing data
